# Supplementary material for: Dual-functional nanoengineering via molecular pillaring and conductive hybridization for high-performance aqueous zinc-ion batteries
Source: Royal Society of Chemistry journal article supplement (doi:10.1039/d5sc09804a), 2026-01-01
Supplement: d5sc09804a1.pdf [file d5sc09804a1.pdf]

## Supporting Information

### **Dual-Functional Nanoengineering *via* Molecular Pillaring and Conductive Hybridization for High-Performance Aqueous Zinc-Ion Batteries**

*Yajiang Wang<sup>a b</sup>, Xiudong Chen<sup>a \*</sup>, Jin-Hang Liu<sup>a</sup>, Dongmei Qi<sup>a b</sup>, Hai-Yan Hu<sup>c</sup>, Huixiong Jiang<sup>a</sup>, Yan Huang<sup>b \*</sup>, Ping Yan<sup>a</sup>, Yao Xiao<sup>c d e \*</sup>*

<sup>a</sup> School of Chemistry and Chemical Engineering, Jiangxi Province Engineering Research Center of Ecological Chemical Industry, Jiujiang University, Jiujiang 332005, China

<sup>b</sup> State Key Laboratory of Organic-Inorganic Composites, Beijing University of Chemical Technology, Beijing 100029, China

<sup>c</sup> College of Chemistry and Materials Engineering, Wenzhou University, Wenzhou, Zhejiang 325035, China

<sup>d</sup> State Key Laboratory of Powder Metallurgy, Central South University, Changsha 410083, China

<sup>e</sup> State Key Laboratory of New Textile Materials and Advanced Processing, Wuhan Textile University, Wuhan 430200, China

## Experimental Section

*Materials:* All reagents were of analytical grade and could be used without further purification. Ammonium vanadate ( $\text{NH}_4\text{VO}_3$ ), Oxalic acid ( $\text{H}_2\text{C}_2\text{O}_4 \cdot 2\text{H}_2\text{O}$ ), Tetra Methyl Ammonium Bromide ( $\text{C}_4\text{H}_{12}\text{BrN}$ , TMAB), graphene oxide (GO), Poly (vinylidene difluoride) (PVDF), acetylene black (AB), zinc trifluoromethanesulfonate ( $\text{Zn}(\text{CF}_3\text{SO}_3)_2$ ) were purchased from Titan Scientific Co., Ltd., Shanghai, China.

*Synthesis of TNVO@GO:*  $\text{NH}_4\text{VO}_3$  (0.64 g) and  $\text{H}_2\text{C}_2\text{O}_4 \cdot 2\text{H}_2\text{O}$  (1.16 g) were dissolved in deionized water (40 mL), and then heated to 60 °C for stirring for 30 minutes. In another beaker, TMAB (0.2311 g) was dissolved in 20 mL of deionized water. Subsequently,  $\text{NH}_4\text{VO}_3$  solution was added to the TMAB solution, with 5 mL (2 mg/mL) of GO added simultaneously. After stirring for 30 minutes, the mixture was transferred into a 100 mL Teflon-lined stainless steel autoclave and heated at 120 °C for 24 h. After cooling to room temperature, the product was washed repeatedly with deionized water and ethanol, followed by overnight drying at 60 °C to obtain TNVO@GO. Without TMAB, NVO was synthesized using the same procedure and conditions. Meanwhile, TNVO was synthesized using the same procedure and conditions without GO.

**Materials characterizations:** The structure and morphology of the synthesized materials were characterized by X-ray diffractometer (XRD, Malvern Panalytical), FTIR (Bruker VERTEX70, 4000-400  $\text{cm}^{-1}$  region) and electron microscopes (SEM, S4800; TEM, Tecnai G2 F 20). Raman spectra were collected with a laser Raman spectrometer (HORIBA XploRA PLUS). The specific surface area and pore size distribution were studied through a Micromeritics TriStar II 3020. X-ray photoelectron spectrometer (K-ALPHA 0.5EV) was utilized to evaluate the cathode material. The annealing process for the synthesized materials was investigated using a thermal

analyzer (America TA TGA55) in O<sub>2</sub>. The unpaired electrons induced by oxygen vacancies in the material were detected by EPR (Bruker ELEXSYS-II E500).

**Electrochemical measurements:** The CR2032 coin cells were assembled with as-prepared cathodes, 100 μm Zn foil anodes, glass fiber separators, and 2 M Zn(CF<sub>3</sub>SO<sub>3</sub>)<sub>2</sub> electrolyte. Cathodes were fabricated by mixing active materials, acetylene black, and NMP-dissolved PVDF solution at an 8:1:1 mass ratio, coated onto Ti foil, and dried at 60 °C for 12 h (mass loading: ~1.7 mg cm<sup>-2</sup>). The LAND-CT3004A system was used to measure specific capacity, GCD performance, rate capability, cycling stability, and GITT (a current density of 0.1 A g<sup>-1</sup> with a relaxation time of 15 min). Moreover, CV (0.1-1.0 mV s<sup>-1</sup> scan rates, 0.2-1.6 V) and EIS measurements were carried out on a CHI760E electrochemical workstation. *Ex situ* XRD measurements and *in situ* Raman measurements were all conducted at a current density of 0.2 A g<sup>-1</sup> (0.2-1.6 V). Battery kinetics were analyzed *via* CV tests at different scan rates. The peak current scan rate correlation is as follows:

$$i = av^b \quad (1)$$

$$\log(i) = b \log(v) + \log(a) \quad (2)$$

where  $i$  is the peak current,  $v$  is the scan rate, and  $a$  and  $b$  are adjustable parameters. The value of  $b$  can be obtained by fitting the CV data using Equation. The capacitive contribution can be quantified using the following formula:

$$i(v) = k_1v + k_2v^{1/2} \quad (3)$$

where  $k_1v$  is the current under capacitive control and  $k_2v^{1/2}$  is the current under diffusion control. The diffusion coefficient of  $Zn^{2+}$  ions is determined using the GITT method, and the formula is as follows:

$$D_{Zn^{2+}} = 4/\pi\tau \times (m_B V_m / M_B S)^2 (\Delta E_S / \Delta E_\tau)^2 \quad (4)$$

where  $D_{Zn^{2+}}$  represents the diffusion coefficient of zinc ions,  $\tau$  is the relaxation time,  $m_B$  is the mass loading of the active material,  $V_m$  is the molar volume,  $M_B$  is the molecular weight,  $S$  is the surface area of the active material, and  $\Delta E_S$  and  $\Delta E_\tau$  are the voltage changes caused by current pulses during charging and discharging, and the voltage change of the constant current pulse, respectively.

**First-Principles Calculations:** This study employed density functional theory (DFT) calculations with the CASTEP module. Based on the generalized gradient approximation (GGA), structural optimization, single-point energy calculations, and electronic property computations of the material model were all executed using the Perdew-Burke-Ernzerhof (PBE) exchange-correlation energy functional. The double numerical plus polarization (DNP) basis set was selected, and core electrons were treated via DFT semi-core pseudopotential (DSPP) to lower computational overhead. To ensure computational results, energy and force convergence criteria were fixed at  $10^{-5}$  Hartree (Ha) and  $0.02 \text{ eV/\AA}$ , respectively. For structural optimization and density of states (DOS) calculations, the Monkhorst-Pack k-point mesh was set to  $3 \times 3 \times 1$  and  $6 \times 6 \times 1$ , respectively.

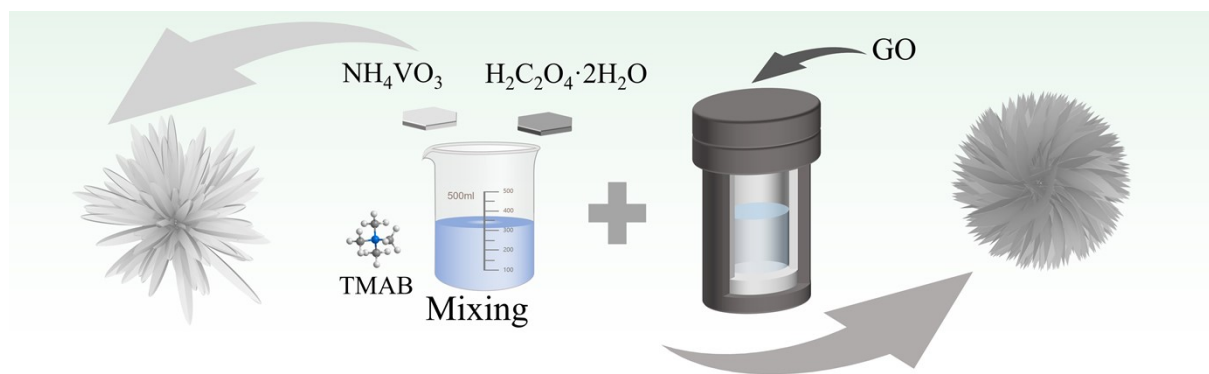

**Fig. S1.** Schematic illustration of the synthesis process of TNVO@GO.

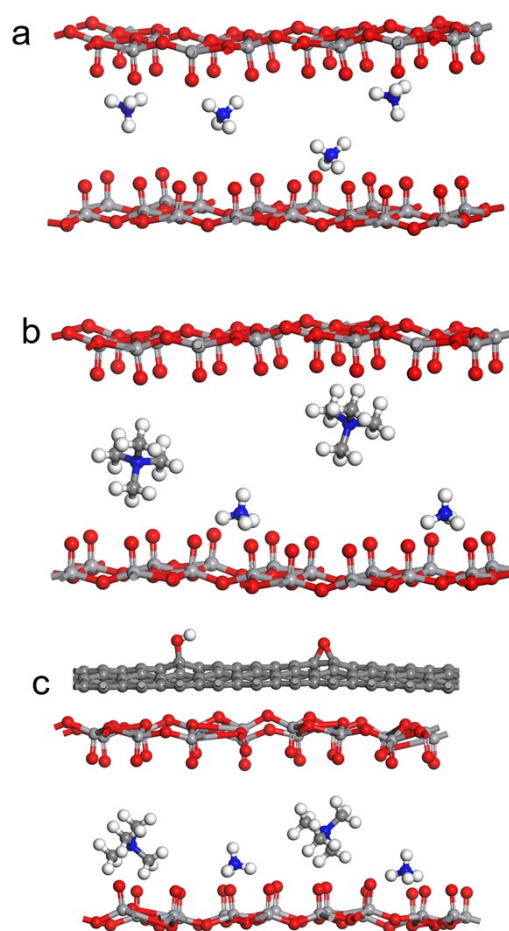

**Fig. S2.** The crystal structures of the (a) NVO, (b) TNVO, and (c) TNVO@GO.

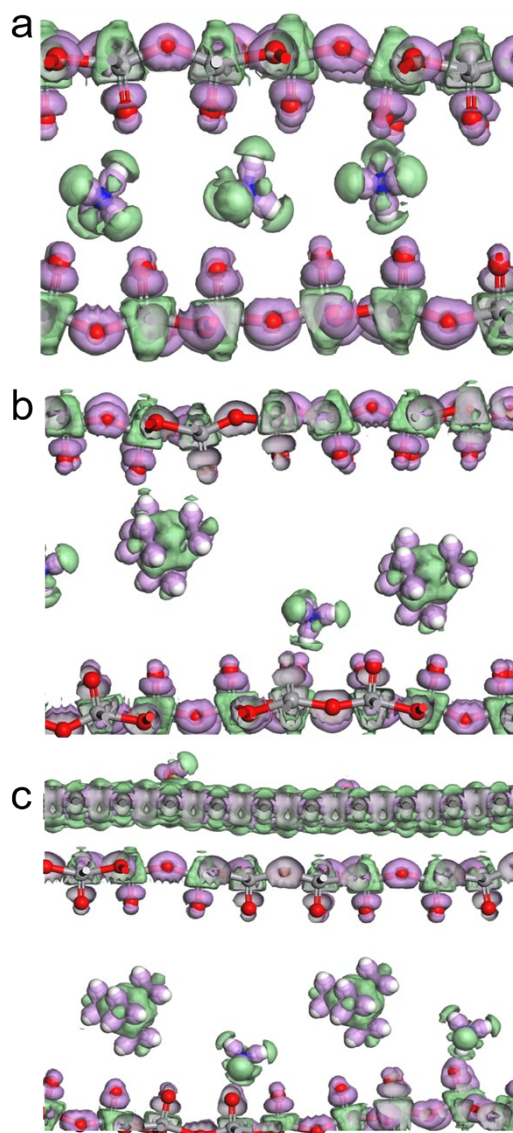

**Fig. S3.** Differential Charge Density of (a) NVO, (b) TNVO, and (c) TNVO@GO.

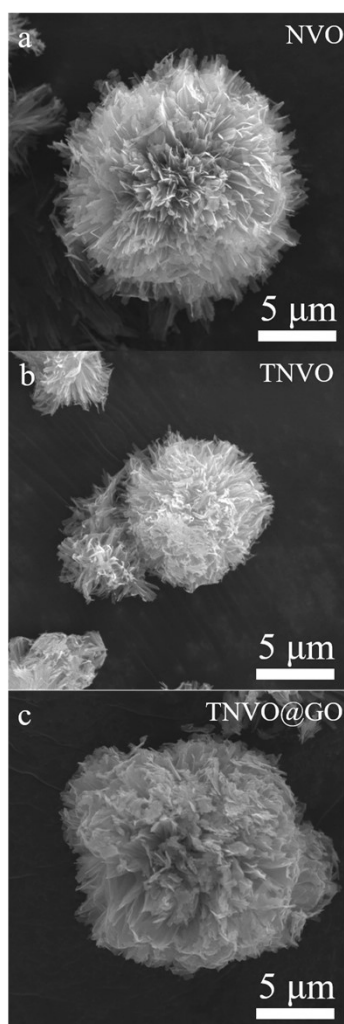

**Fig. S4.** SEM images of (a) NVO, (b) TNVO, and (c) TNVO@GO.



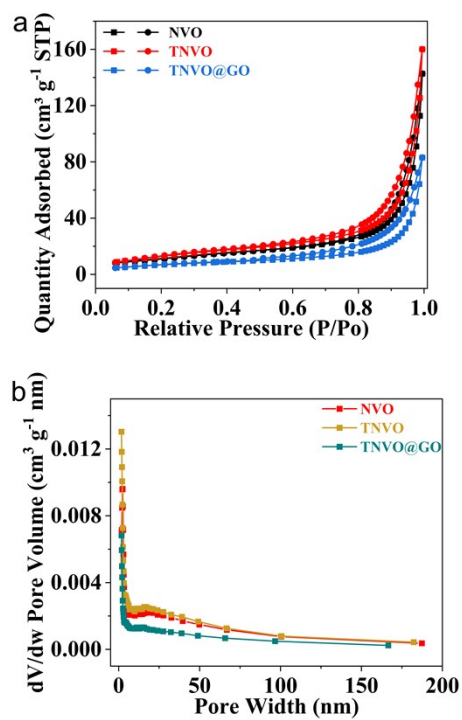

**Fig. S5.** (a)  $\text{N}_2$  adsorption/desorption isotherms and (b) the pore size distribution of NVO, TNVO, and TNVO@GO.

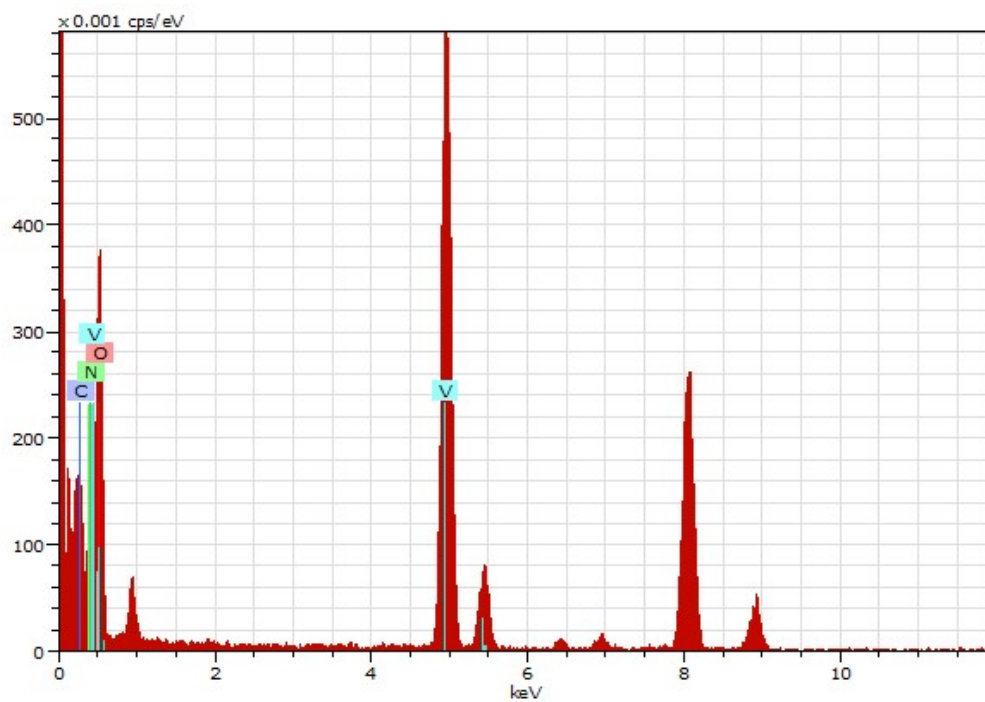

**Fig. S6.** The elemental mapping of TNVO@GO.

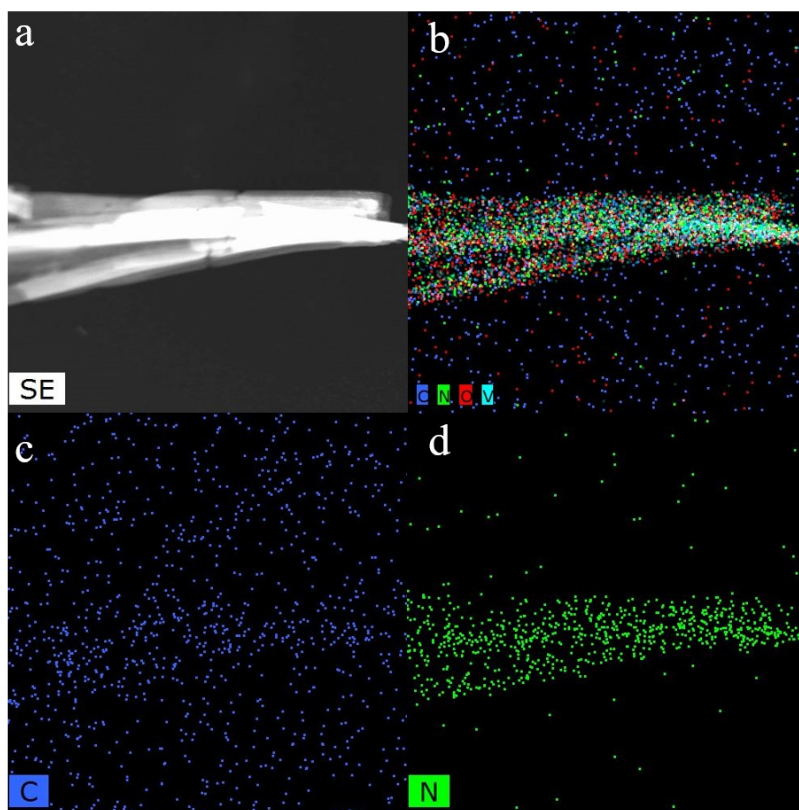

**Fig. S7.** The HAADF image and the corresponding elemental mappings of TNVO@GO.

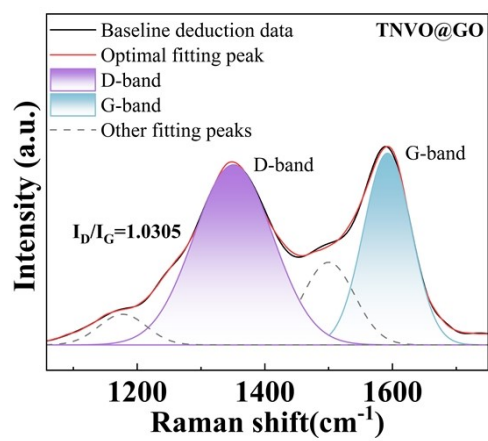

**Fig. S8.** Analysis of the Degree of Graphitization of TNVO@GO.

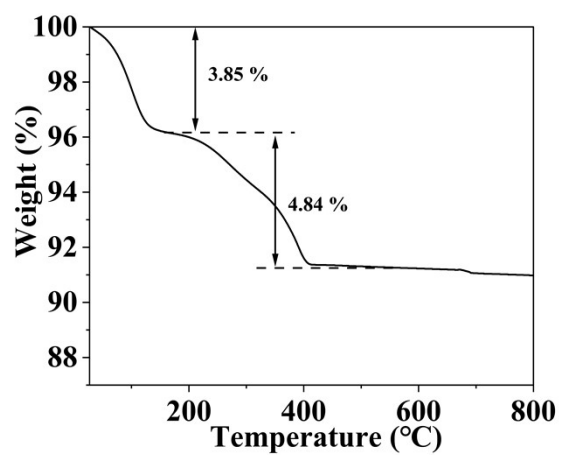

**Fig. S9.** TG curves of TNVO.

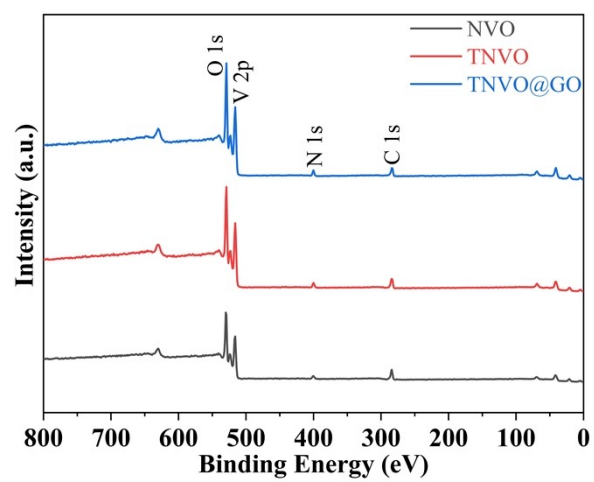

**Fig. S10.** The survey XPS spectrum of NVO, TNVO, and TNVO@GO.

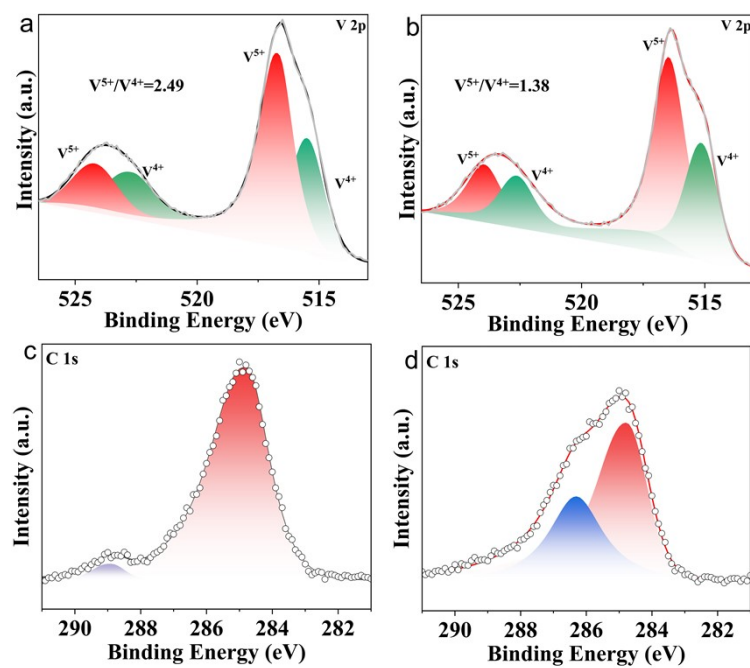

**Fig. S11.** The V 2p spectra of (a) NVO and (b) TNVO. The C 1s spectra of (c) NVO and (d) TNVO.

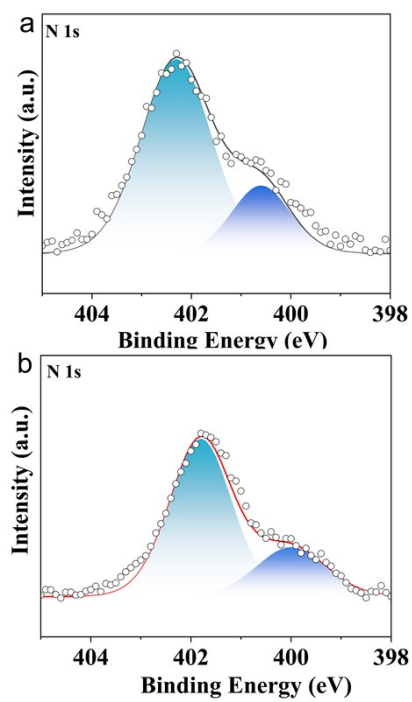

**Fig. S12.** The N 1s spectra of (a) NVO and (b) TNVO.



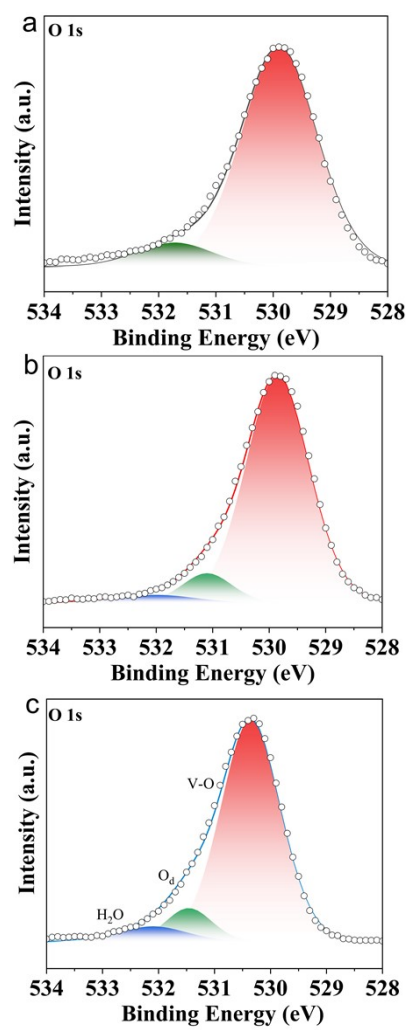

**Fig. S13.** The O 1s spectra of (a) NVO, (b) TNVO, and (c) TNVO@GO.

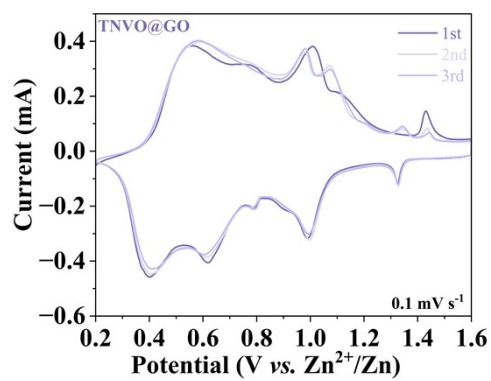

**Fig. S14.** The CV curves of TNVO@GO for the first three cycles at 0.1 mV s<sup>-1</sup>.

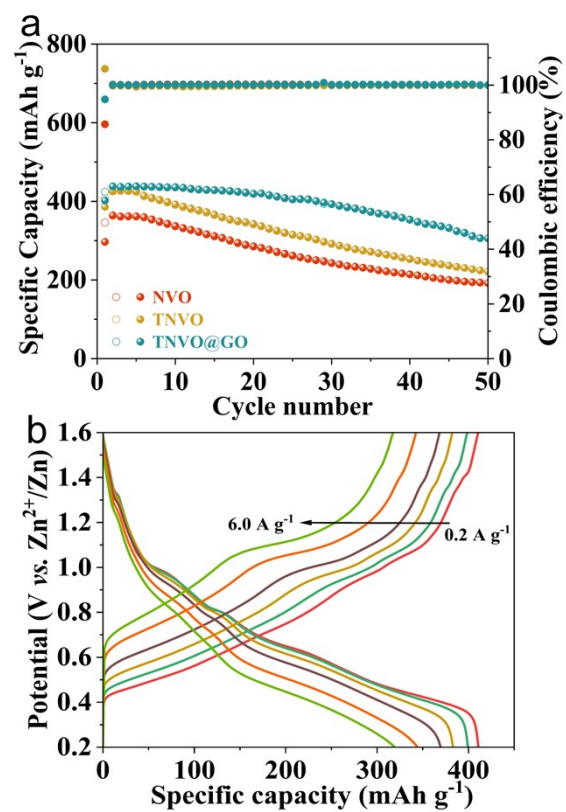

**Fig. S15.** (a) The Cycling performance at current density of  $0.2 \text{ A g}^{-1}$ . (b) The discharge and charge profiles at various current densities of TNVO@GO.

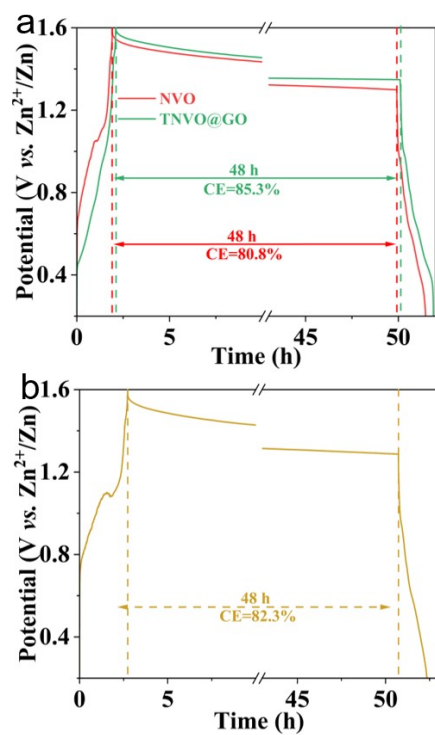

**Fig. S16.** Self-discharge test of (a) NVO and TNVO@GO and (b) TNVO.

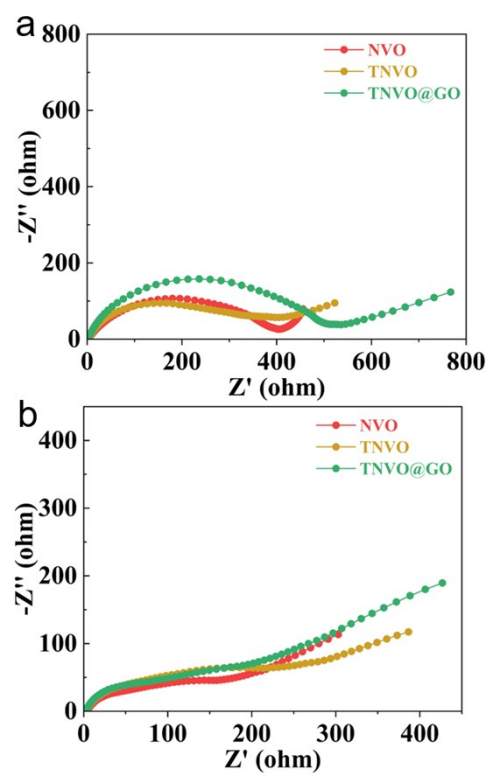

**Fig. S17.** Nyquist diagram (a) before and (b) after cycling.

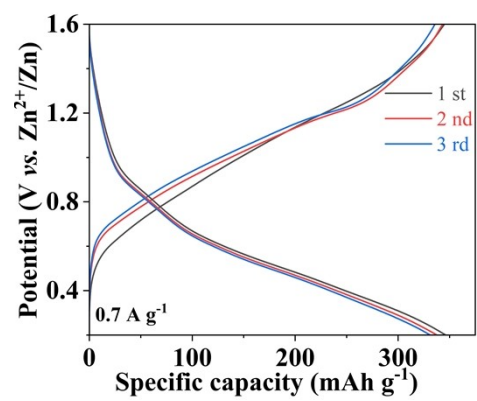

**Fig. S18.** The GCD of TNVO@GO soft pack battery.

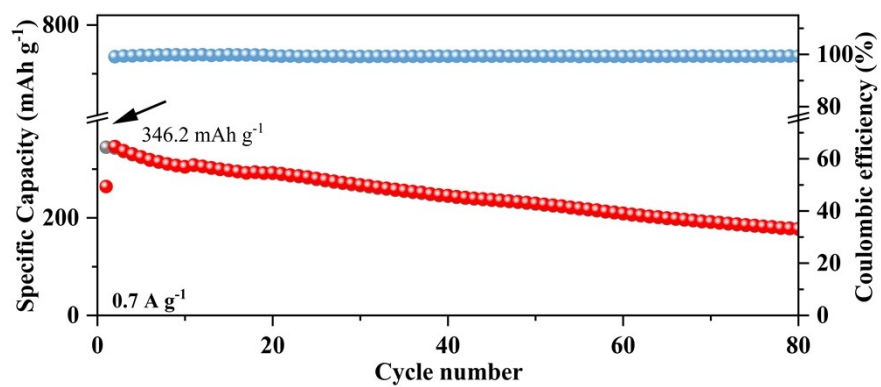

**Fig. S19.** Long cycling performance of TNVO@GO soft pack battery at 0.7 A g<sup>-1</sup>.

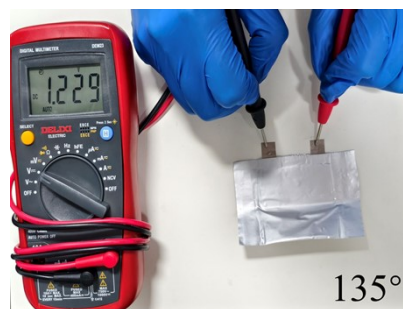

**Fig. S20.** The open circuit voltage of TNVO@GO soft pack battery at  $135^\circ$  bending states.



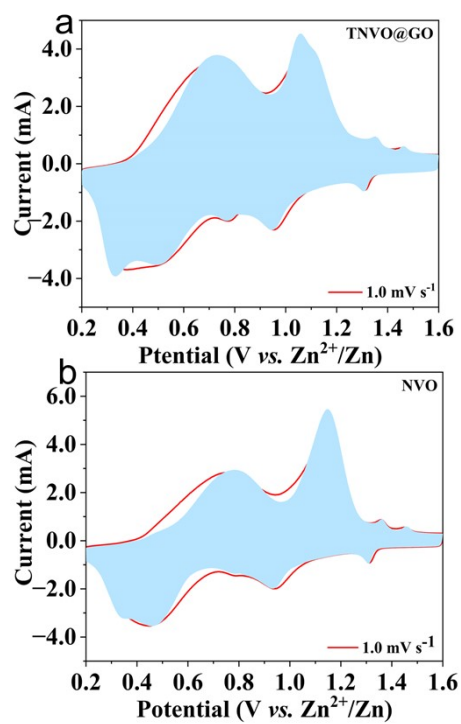

**Fig. S21.** Schematic diagram of pseudocapacitance contribution of (a) TNVO@GO and (b) NVO at 1.0 mV s<sup>-1</sup>.

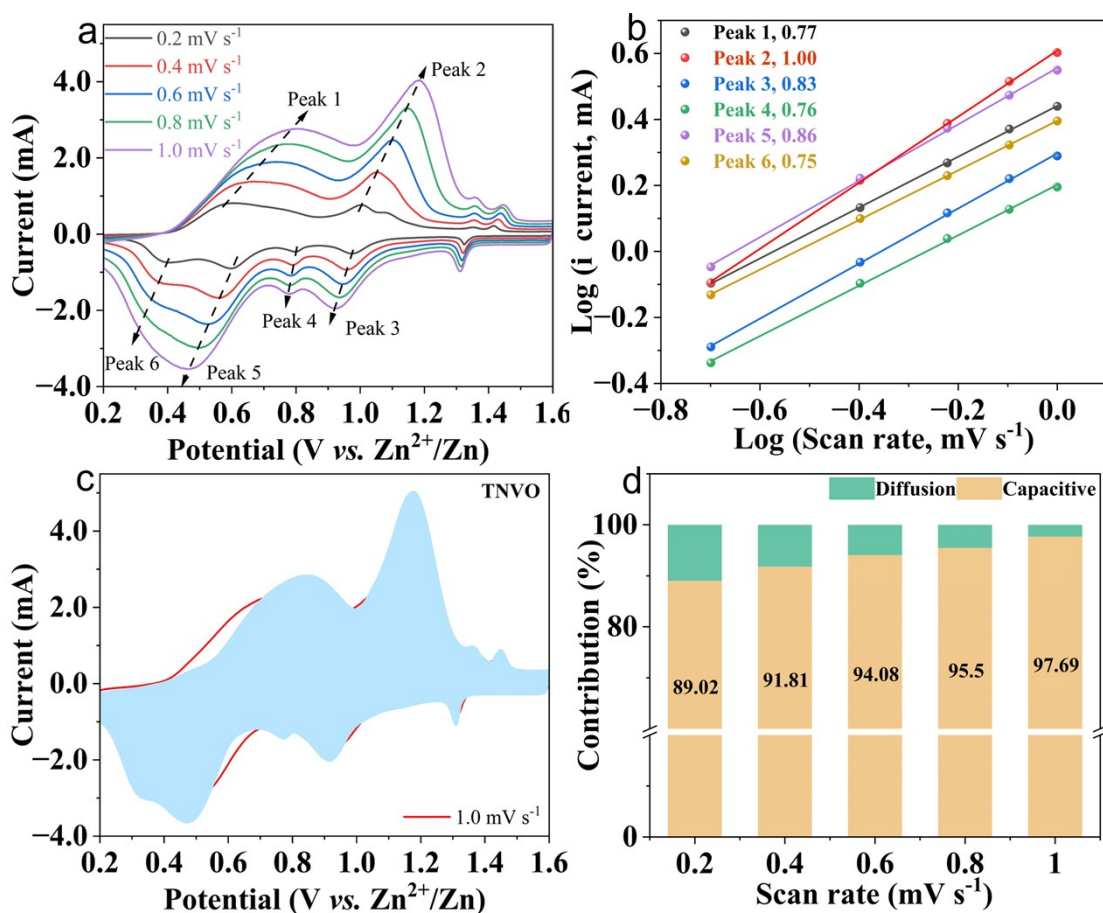

**Fig. S22.** (a) CV curves at various scan rates of TNVO. (b) The log (peak current) vs. log (scan rate) plot for each redox peak of TNVO. (c) Schematic diagram of pseudocapacitance contribution of TNVO at 1.0  $\text{mV s}^{-1}$ . (d) Bar diagram for the contribution ratio between capacitive-controlled capacities and diffusion-controlled capacities for various scan rates of TNVO.

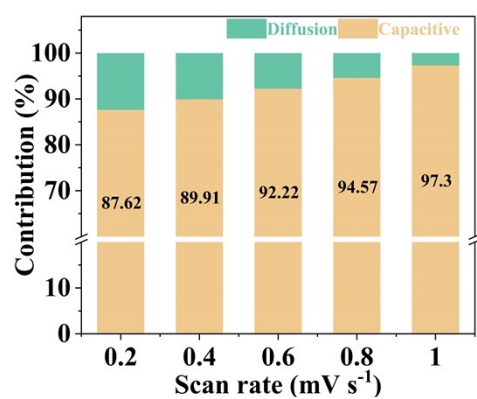

**Fig. S23.** Bar diagram for the contribution ratio between capacitive-controlled capacities and diffusion-controlled capacities for various scan rates of NVO.

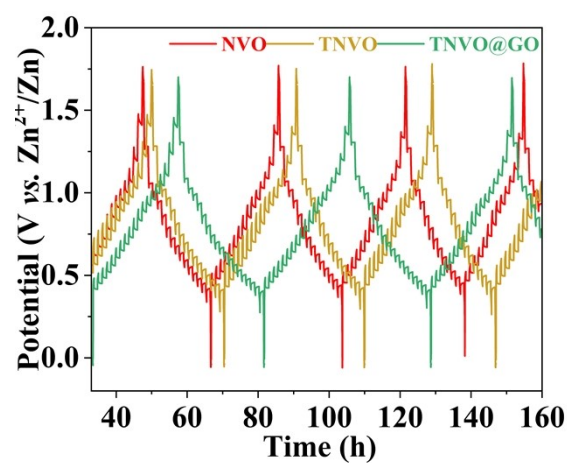

**Fig. S24.** Charge and discharge GITT curves of NVO, TNVO, and TNVO@GO at the current density of  $0.1 \text{ A g}^{-1}$ .

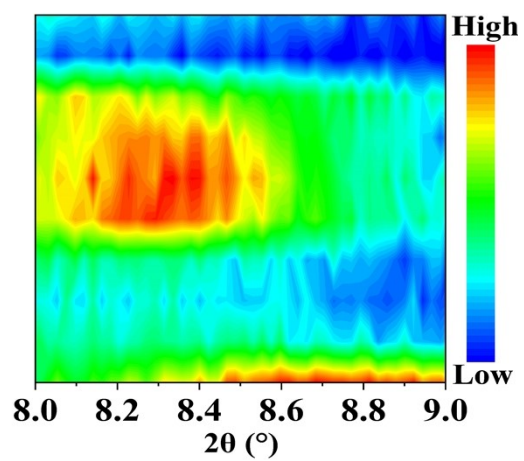

**Fig. S25.** Partial *ex-situ* XRD pattern of TNVO@GO ( $2\theta = 8\text{-}9^{\circ}$ ).

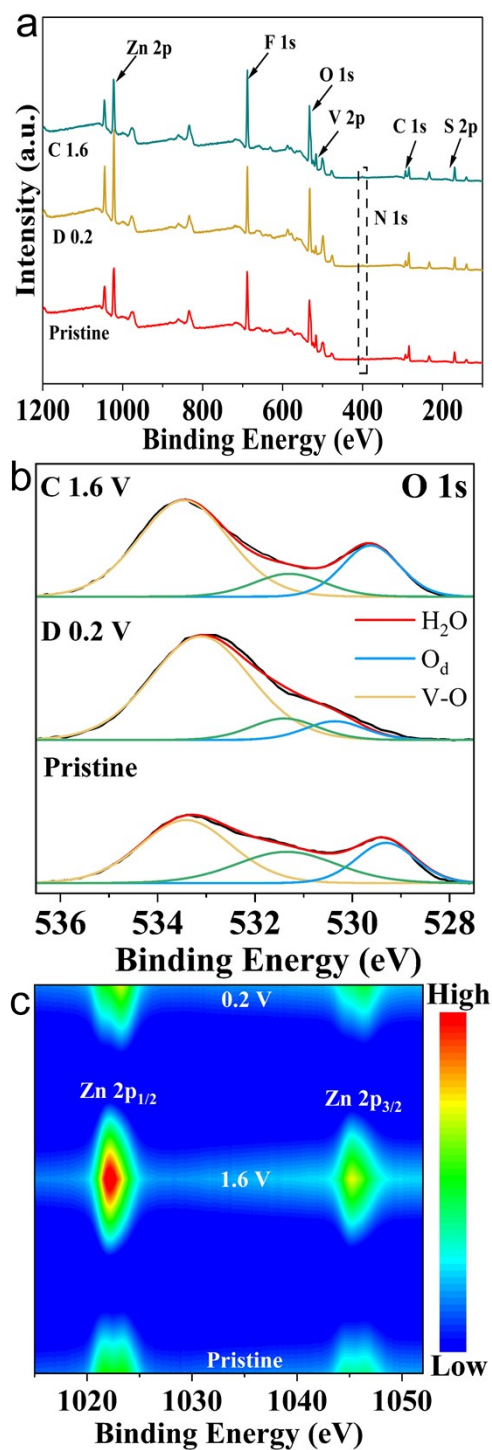

**Fig. S26.** (a) Ex-situ XPS survey spectrum in the fully charged and discharged states of TNVO@GO electrodes. Ex-situ XPS spectra of (b) O 1s and (c) Zn 2p of TNVO@GO electrodes.

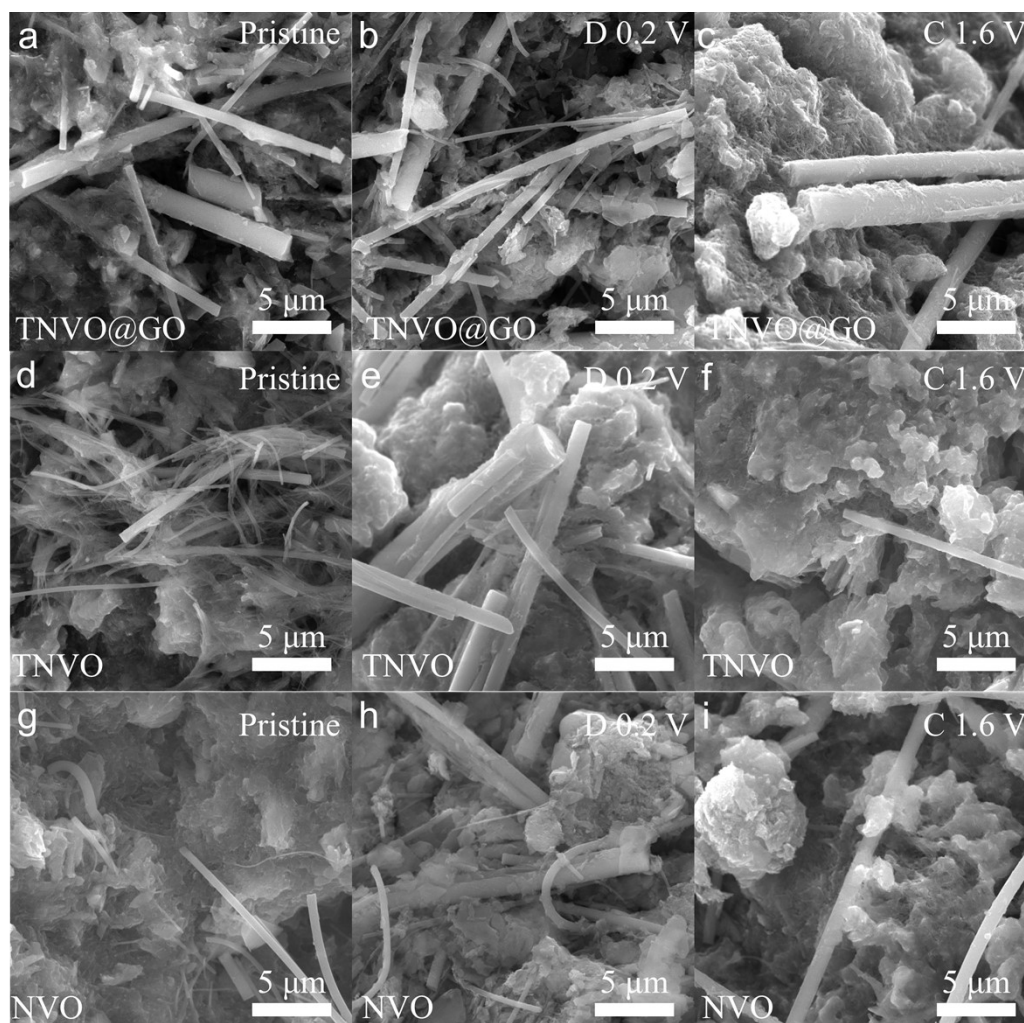

**Fig. S27.** *Ex-situ* SEM images of NVO, TNVO and TNVO@GO in the fully charged and discharged states.

**Table S1.** Atomic occupany table

| label | elem | mult | x     | y | z     | frac | Uiso  |
|-------|------|------|-------|---|-------|------|-------|
| V1    | V+3  | 4    | 0.93  | 0 | 0.167 | 1    | aniso |
| V2    | V+3  | 4    | 0.229 | 0 | 0.174 | 1    | aniso |
| O1    | O-2  | 4    | 0.389 | 0 | 0.146 | 1    | aniso |
| O2    | O-2  | 4    | 0.082 | 0 | 0.11  | 1    | aniso |
| O3    | O-2  | 4    | 0.758 | 0 | 0.104 | 1    | aniso |
| O4    | O-2  | 4    | 0.954 | 0 | 0.355 | 1    | aniso |
| O5    | O-2  | 4    | 0.212 | 0 | 0.365 | 1    | aniso |
| N1    | N    | 4    | 0.61  | 0 | 0.49  | 0.5  | aniso |
| O6    | O-2  | 4    | 0.61  | 0 | 0.49  | 0.5  | aniso |



**Table S2.** Comparison of energy density of TNVO@GO cathode with other reported aqueous cathodes.

| Eletrode materials                                                                        | power density<br>(W kg <sup>-1</sup> ) | energy density<br>(Wh kg <sup>-1</sup> ) | Reference |
|-------------------------------------------------------------------------------------------|----------------------------------------|------------------------------------------|-----------|
| NVO-300                                                                                   | 209                                    | 245                                      | [37]      |
| (NH <sub>4</sub> ) <sub>0.78</sub> V <sub>4</sub> O <sub>10-x</sub> ·1.49H <sub>2</sub> O | 398                                    | 184                                      | [38]      |
| (NH <sub>4</sub> ) <sub>2</sub> V <sub>10</sub> O <sub>25</sub> ·8H <sub>2</sub> O        | 200                                    | 280                                      | [39]      |
| CVO                                                                                       | 53                                     | 267                                      | [40]      |
| VO <sub>2</sub>                                                                           | 139                                    | 232                                      | [41]      |
| CaVO                                                                                      | 206                                    | 329                                      | [42]      |
| Cu <sub>3</sub> V <sub>2</sub> O <sub>7</sub> (OH) <sub>2</sub> ·2H <sub>2</sub> O        | 96                                     | 228                                      | [43]      |
| V <sub>2</sub> O <sub>x</sub> @V <sub>2</sub> CT <sub>x</sub>                             | 38                                     | 228                                      | [44]      |
| Zn/Mn-MOF-74                                                                              | 108                                    | 277                                      | [45]      |
| a-ZVO                                                                                     | 36                                     | 116                                      | [46]      |
| HAVO-FeMo <sub>6</sub> -50                                                                | 203                                    | 304                                      | [47]      |
| NVO                                                                                       | 381                                    | 321                                      | [48]      |
| TNVO@GO                                                                                   | 140                                    | 314                                      | This work |
